# Supplementary material
Source: Springer Nature journal article supplement (https://www.springermedizin.de/resource/supplementary/12986_2012_524_MOESM2_ESM.pdf/25654938)

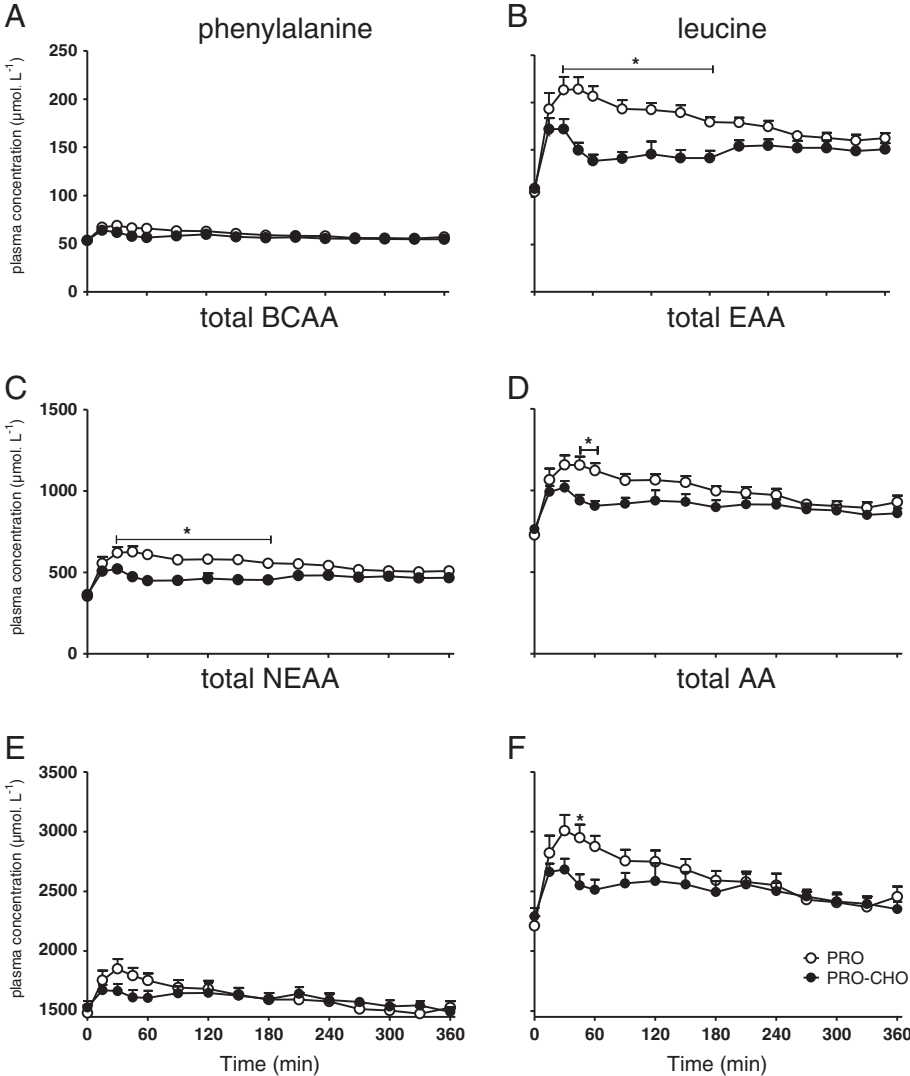

Supplement: MOESM2 [file 25654938]
